# Supplementary material
Source: HighWire-hosted journal article supplement (https://openheart.bmj.com/content/7/1/e001262)
Supplement: inline-supplementary-material-1 [file inline-supplementary-material-1.pdf]

**Aortic Stenosis**

V max >4.0 m/s or EOA < 1.0cm<sup>2</sup> every 6 months + consider annual ETT  
 V max 3.5 – 4.0 m/s + AV calcium every 6 months  
 V max 3.0 – 4.0 m/s or EOA 1.0 – 1.5cm<sup>2</sup> every year + ETT at baseline, when becomes severe and consider every year after this if early surgery clinically appropriate  
 V max 2.5 – 3.0 m/s every 3 years

**Echocardiographic Alerts**

- Any reduction in LV ejection fraction
- EOA  $\leq$  0.6cm<sup>2</sup>
- V max  $\geq$  5.0m/s
- Rapid progression of V max > 0.3 m/s per year
- New diastolic dysfunction (pseudonormal or restrictive)
- Aortic root dilated to 45 mm (Marfan), 55 mm (other)

**Other Alerts**

- Spontaneous symptoms
- New arrhythmia
- Patient request
- Suggestion of endocarditis

**Mitral Stenosis**

**Severe:** every 6 months (ETT annually)  
**Moderate:** every year  
**Mild:** every 2 years

**Echocardiographic alerts:**

- New PA hypertension or rise in PA systolic pressure towards 50 mmHg
- RV dysfunction

**Other alerts:**

- Symptoms
- INR > 4.0 or < 1.5 in last 6 months
- New atrial fibrillation
- TIA or stroke
- Patient request
- Suggestion of endocarditis

**Pulmonary Stenosis**

**Severe:** every year  
**Moderate:** every year  
**Mild:** no follow up unless indicated

**Echocardiographic alerts:**

- New RV dilation
- Velocity > 3.5 m/s

**Other alerts:**

- Spontaneous symptoms
- New arrhythmia
- Suggestion of endocarditis
- Patient request

**Aortic Regurgitation**

**Severe:** every 6 months or every 3 months at request of cardiologist if LV significantly dilated. (consider ETT annually)  
**Moderate:** every year  
**Mild:** not unless aortic root dilated

**Echocardiographic alerts:**

- LVSD approaching 50 mm or LVDD 70 mm
- LVSD change (>5mm from previous study) or volume increase since last study
- LVEF approaching 50%

**Other alerts:**

- Spontaneous symptoms
- New arrhythmia
- Patient request
- Suggestion of endocarditis

**Mitral Regurgitation**

**Severe:** every 6 months + annual ETT  
**Moderate:** every year  
**Mild:** not followed

**Echocardiographic alerts:**

- LVSD approaching 40 mm
- LV EF approaching 60%
- PA systolic pressure approaching 50mmHg

**Other alerts:**

- Symptoms
- New arrhythmia
- Patient request
- Suggestion of endocarditis

**Tricuspid / Pulmonary Regurgitation**

**Severe:** every 6 months  
**Moderate:** every year

**Echocardiographic alerts:**

- Progressive RV dilatation
- New RV hypokinesia

**Other alerts:**

- Spontaneous symptoms
- New arrhythmia
- Suggestion of endocarditis
- Patient request

**Aortic Root Dilatation**

**Marfan:** annually unless dilated to > 40 mm, then every 6 months  
**Non-Marfan:** annually  
**Bicuspid:** annually

**Echocardiographic alerts:**

- Marfan 45 mm or change > 3 mm in one year
- Bicuspid valve 55 mm or change > 3 mm in one year
- Non-Marfan 55 mm or change > 3 mm in one year
- Worsening AR

**Other alerts:**

- Chest pain, dysphagia or change in voice
- New arrhythmia
- Patient request
- Suggestion of endocarditis

**Mitral & Tricuspid Valve Repair**

– Echo at 12 months –  
 If repair, competent, continue clinical surveillance annually in nurse-led clinic.

If repair impaired, continue echo surveillance per native dysfunction.

**Echocardiographic alerts:**

- Worsening regurgitation – see MR/TR sections
- Systolic anterior motion

**Other alerts:**

- Spontaneous symptoms
- New arrhythmia
- Patient request
- Suggestion of endocarditis

**Post-Endocarditis (non-operated)**

Echocardiogram at 1, 3, and 6 months  
 Then according to residual pathology

**Bicuspid Valve (no AS/AR)**

Every 3 years

**Post AVR****AVR native root monitoring (previous Bicuspid AV)**

(Dimensions on post-op echo)  
 <40 mm No routine surveillance  
 40 – 45 mm Echo at 5 years then review  
 >45 mm Annual echo

**AVR with Aortic Root Replacement (Marfans/Ehlers Danlos)**

Per valve type below

2 yearly CMR scanning (renal bloods needed prior to scan)

**Replacement Heart Valves**

**Every valve once** postoperatively if not performed before discharge

**Mechanical valves** annually only if there is any of the following:

- Associated root dilatation (see specific guide)
- LV dilatation
- More than mild paraprosthesis regurgitation
- More than moderate TR

**New designs of biological aortic valve** every year after 5 years (e.g. Trifecta)

**Established aortic biological designs** (including homografts) every year after 10 years

**Biological mitral valves** every year after 5 years

**Ross procedures** every year

**Echocardiographic alerts:**

- New or worsening regurgitation
- Obstruction – reduction of EOA by 25%
- Change in LV or systolic function (or RV for right-sided valves)

**Other alerts:**

- Exertional symptoms
