# Supplementary material
Source: HighWire-hosted journal article supplement (https://openheart.bmj.com/content/7/1/e001262)
Supplement: inline-supplementary-material-2 [file inline-supplementary-material-2.pdf]

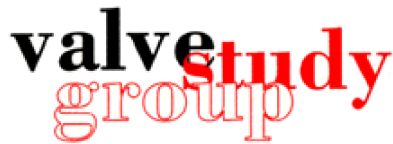

**FOLLOW – UP VISIT**

|                                                                                                                                                                                                                                                                                                                                                                                                 |                                                                                                                                                                                                                      |
|-------------------------------------------------------------------------------------------------------------------------------------------------------------------------------------------------------------------------------------------------------------------------------------------------------------------------------------------------------------------------------------------------|----------------------------------------------------------------------------------------------------------------------------------------------------------------------------------------------------------------------|
| (Attach Patient Identification Label)                                                                                                                                                                                                                                                                                                                                                           | <p><b>Valve Study Group</b><br/>5<sup>th</sup> Floor, East Wing<br/>St. Thomas' Hospital<br/>London<br/>SE1 7EH<br/>Tel 020 7188 0726<br/>Fax 020 7188 0728</p>                                                      |
| <b>Date:</b>                                                                                                                                                                                                                                                                                                                                                                                    | <b>Primary Consultant:</b> Consultant / Nurse / Sonographer                                                                                                                                                          |
| <b>Visit:</b> Scheduled / Unscheduled                                                                                                                                                                                                                                                                                                                                                           | <b>Valve Pathology:</b> AS / AR / Mixed<br>MS / MR / Mixed<br>AVR / MVR / Repair<br>Other:                                                                                                                           |
| <b>Reason for Visit:</b>                                                                                                                                                                                                                                                                                                                                                                        |                                                                                                                                                                                                                      |
| <p><b>Symptoms &amp; Events:</b><br/>NYHA : I II III IV<br/>SAS: 1 2 3 4<br/>Exertional SOB: N / Y<br/>Syncope/presyncope : N / Y<br/>Chest Pain : N / Y<br/>New arrhythmia : N / Y<br/>New ankle swelling N/Y<br/>TIA/CVA: N / Y<br/>ACS : N / Y<br/>Endocarditis: N / Y<br/>Other Events : N / Y</p>                                                                                          | <b>Comments:</b>                                                                                                                                                                                                     |
| <p><b>Investigations in Clinic:</b><br/>Echo: N / Y<br/>ECG: N / Y<br/>Bloods: N / Y Specify:<br/>BNP: N / Y Result:<br/>Exercise Test: N / Y Result:<br/>Pacemaker check N / Y<br/>EP Opinion N / Y</p>                                                                                                                                                                                        | <p><b>Examination:</b><br/>BP :<br/><br/>Heart Sounds:<br/><br/>Chest Auscultation:</p>                                                                                                                              |
| <b>Medication:</b>                                                                                                                                                                                                                                                                                                                                                                              | <p><b>Advice :</b><br/>Dental : Regular / Reminded / Dentures / N/A<br/>Antibiotic Prophylaxis Card : Given / Has / N/A<br/><br/>Contraception : Y / N/ n/a<br/>INR therapeutic (mech Valves only) : Y / N / n/a</p> |
| <p><b>Plan:</b><br/><b>Rebook</b> : 3mnths / 6mnths / 1 Year / Other<br/>: Consultant/ Nurse / Sonographer<br/><br/><b>Instructions:</b> Echo / BNP / Ex Test / ECG / Bloods<br/><b>Medical Referral:</b> Yes / No<br/>1 = event/change in symptoms<br/>2 = echo threshold reached<br/>3 = patient request<br/>4 = sonographer/nurse request<br/>5 = change in medication<br/><br/>JAN 2020</p> | <p><b>Signature:</b><br/><br/><b>Designation:</b><br/><br/><b>Date:</b></p>                                                                                                                                          |
